# Supplementary material for: Expression of chemokines CXCL4 and CXCL7 by synovial macrophages defines an early stage of rheumatoid arthritis
Source: HighWire-hosted journal article supplement (doi:10.1136/annrheumdis-2014-206921), 2015-04-10
Supplement: annrheumdis-2014-206921supp_table.pdf [file annrheumdis-2014-206921supp_table.pdf]

## Supplementary Table 1

Custom Gene Set 1

| Gene symbol | Gene name                                           |
|-------------|-----------------------------------------------------|
| CSF3        | Colony-stimulating factor 3                         |
| CSF2        | Colony-stimulating factor 2                         |
| CSF1        | Colony-stimulating factor 1                         |
| IFNA1       | Interferon alpha 1                                  |
| IFNA2       | Interferon alpha 2                                  |
| IFNB1       | Interferon beta 1                                   |
| IFNG        | Interferon gamma                                    |
| IL1A        | Interleukin 1 alpha                                 |
| IL1B        | Interleukin 1 beta                                  |
| IL1RN       | Interleukin 1 receptor antagonist                   |
| 18S         | 18S                                                 |
| IL2         | Interleukin 2                                       |
| IL3         | Interleukin 3                                       |
| IL4         | Interleukin 4                                       |
| IL5         | Interleukin 5                                       |
| IL6         | Interleukin 6                                       |
| IL7         | Interleukin 7                                       |
| CXCL8       | Chemokine (C-X-C motif) ligand 8                    |
| IL9         | Interleukin 9                                       |
| IL10        | Interleukin 10                                      |
| IL11        | Interleukin 11                                      |
| IL12A       | Interleukin 12 alpha                                |
| IL12B       | Interleukin 12 beta                                 |
| IL13        | Interleukin 13                                      |
| IL14        | Interleukin 14                                      |
| IL15        | Interleukin 15                                      |
| IL16        | Interleukin 16                                      |
| IL17A       | Interleukin 17A                                     |
| IL17F       | Interleukin 17F                                     |
| IL18        | Interleukin 18                                      |
| IL19        | Interleukin 19                                      |
| IL20        | Interleukin 20                                      |
| IL22        | Interleukin 22                                      |
| IL23A       | Interleukin 23 alpha                                |
| IL24        | Interleukin 24                                      |
| IL25        | Interleukin 25                                      |
| IL26        | Interleukin 26                                      |
| IL27        | Interleukin 27                                      |
| IL28A       | Interleukin 28 alpha                                |
| IL29        | Interleukin 29                                      |
| IL32        | Interleukin 32                                      |
| IL33        | Interleukin 33                                      |
| LIF         | Leukemia inhibitory factor                          |
| OSM         | Oncostatin M                                        |
| LTA         | Lymphotoxin alpha                                   |
| TNF         | Tumour necrosis factor alpha                        |
| LTB         | Lymphotoxin beta                                    |
| OX40L       | OX40 ligand                                         |
| CD40LG      | CD40 ligand                                         |
| FASLG       | FAS ligand                                          |
| CD70        | CD70                                                |
| CD30L       | CD30 ligand                                         |
| 4-1BBL      | 4-1BB ligand                                        |
| TRAIL       | TNF-related apoptosis inducing ligand               |
| RANKL       | receptor activator of nuclear factor kappa B ligand |
| TWEAK       | TNF-related WEAK inducer of apoptosis               |
| APRIL       | A proliferation-inducing ligand                     |
| BAFF        | B-cell-activating factor                            |
| LIGHT       | Ligand for herpes virus entry mediator              |
| TL1A        | TNF ligand-related molecule 1                       |
| GITRL       | Glucocorticoid-induced TNF-related ligand           |
| CD40        | CD40                                                |
| FAS         | FAS                                                 |
| GITR        | Glucocorticoid-induced TNFR-related protein         |
| TGFB1       | Transforming growth factor beta-1                   |
| TGFB2       | Transforming growth factor beta-2                   |
| TGFB3       | Transforming growth factor beta-3                   |

---

Custom Gene Set 2 designed to determine expression of weakly-expressed genes and genes with non-intron spanning primers.

---

| Gene symbol | Gene name                                |
|-------------|------------------------------------------|
| CSF2        | Colony-stimulating factor 2              |
| CSF3        | Colony-stimulating factor 3              |
| IFNA1       | Interferon alpha 1                       |
| IFNA2       | Interferon alpha 2                       |
| IFNB1       | Interferon beta 1                        |
| IFNG        | Interferon gamma                         |
| IL1A        | Interleukin 1 alpha                      |
| IL2         | Interleukin 2                            |
| IL3         | Interleukin 3                            |
| IL4         | Interleukin 4                            |
| IL5         | Interleukin 5                            |
| IL9         | Interleukin 9                            |
| IL11        | Interleukin 11                           |
| IL12A       | Interleukin 12 alpha                     |
| IL12B       | Interleukin 12 beta                      |
| IL13        | Interleukin 13                           |
| IL17A       | Interleukin 17A                          |
| IL17F       | Interleukin 17F                          |
| IL19        | Interleukin 19                           |
| IL20        | Interleukin 20                           |
| IL21        | Interleukin 21                           |
| IL22        | Interleukin 22                           |
| IL23A       | Interleukin 23 alpha                     |
| IL24        | Interleukin 24                           |
| IL25        | Interleukin 25                           |
| IL28A       | Interleukin 28 alpha                     |
| IL29        | Interleukin 29                           |
| CCL1        | Chemokine (C-C motif) ligand 1           |
| CCL7        | Chemokine (C-C motif) ligand 7           |
| CCL11       | Chemokine (C-C motif) ligand 11          |
| CCL25       | Chemokine (C-C motif) ligand 25          |
| LTA         | Lymphotoxin alpha                        |
| TL1A        | TNF ligand-related molecule 1            |
| KITLG       | KIT ligand                               |
| ADIPOQ      | Adiponectin                              |
| MIF         | Macrophage migration inhibitory factor   |
| GAPDH       | Glyceraldehyde-3-phosphate dehydrogenase |
